# Supplementary material for: Suppression of Postprandial Blood Glucose Fluctuations by a Low-Carbohydrate, High-Protein, and High-Omega-3 Diet via Inhibition of Gluconeogenesis
Source: PubMed Central journal article supplement (PMC6073393; doi:10.3390/ijms19071823), 2018-06-21
Supplement: ijms-19-01823-s001.pdf [file ijms-19-01823-s001.pdf]

# Supplementary Materials

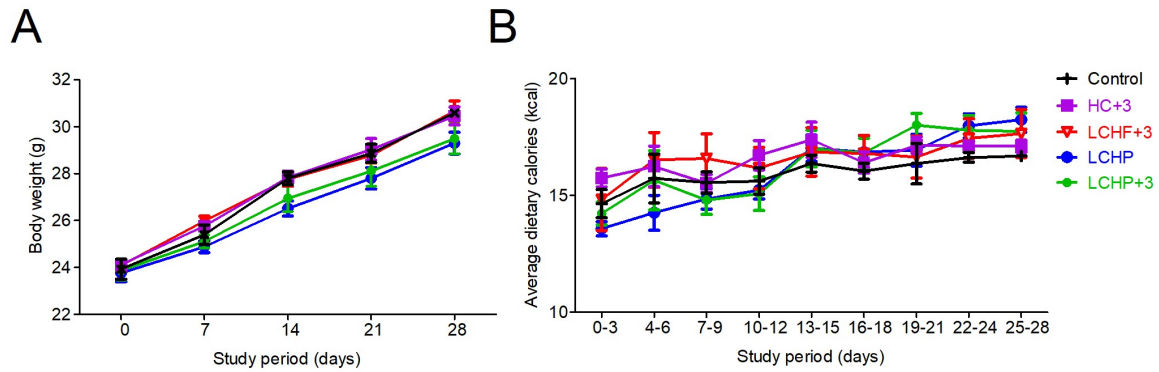

**Figure S1.** Effects of various diets on body weight and dietary energy intake during the whole study period. **(A)** Body weight; **(B)** Dietary energy intake. The five study diets consisted of a high carbohydrate/low omega-3 (Control) diet, a high carbohydrate/high omega-3 (HC+3) diet, a low carbohydrate/high fat/high omega-3 (LCHF+3) diet, a low carbohydrate/high protein/low omega-3 (LCHP) diet, and a low carbohydrate/high protein/high omega-3 (LCHP+3) diet (see Tables S1 and S2 for details). Values shown as mean  $\pm$  SEM.  $n = 8$  per group.

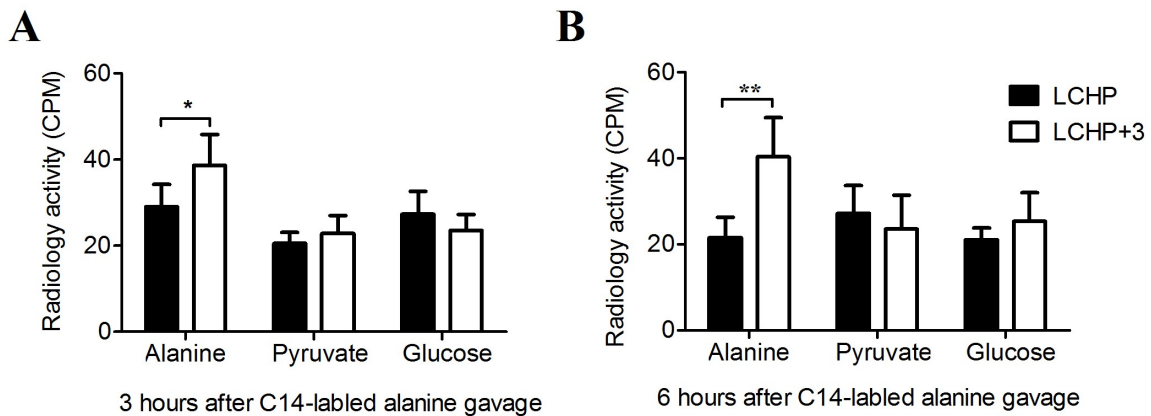

**Figure S2.** Effects of the LCHP+3 diet on  $^{14}\text{C}$ -radiolabeled alanine conversion. **(A)** 3 hours after  $^{14}\text{C}$ -alanine gavage; **(B)** 6 hours after  $^{14}\text{C}$ -alanine gavage. LCHP, low carbohydrate/high protein/low omega-3; LCHP+3, low carbohydrate/high protein/high omega-3. Values shown as mean  $\pm$  SEM; \*  $p < 0.05$ , \*\*  $p < 0.01$ ;  $n = 6$  per group.

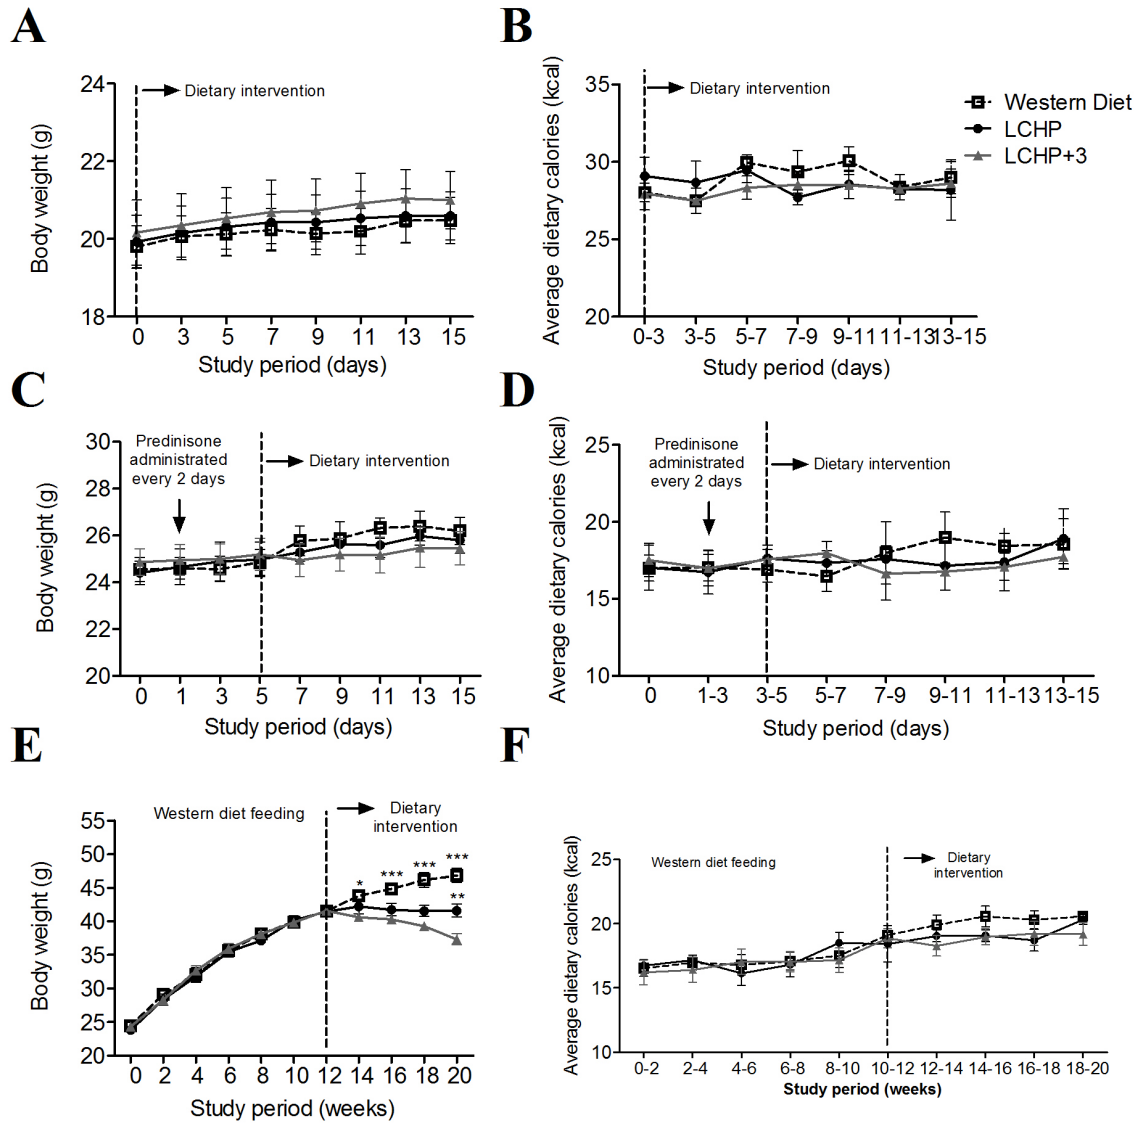

**Figure S3.** Changes of body weight and energy intake among the groups during the study period of various hyperglycemia models. (A,B) Streptozotocin-induced type 1 diabetes; (C,D) Steroid-induced diabetes-like hyperglycemia; (E,F) Western diet-induced metabolic syndrome. LCHP, low carbohydrate/high protein/low omega-3; LCHP+3, low carbohydrate/high protein/high omega-3. Values shown as mean  $\pm$  SEM. Compared with the LCHP+3 group, \*  $p < 0.05$ , \*\*  $p < 0.01$ , \*\*\*  $p < 0.001$ ;  $n = 6$  per group.

**Table S1.** Nutrient composition of the experimental diets (per 100g diet).

|                            | <b>Control</b> | <b>HC+3</b> | <b>LCHF+3</b> | <b>LCHP</b> | <b>LCHP+3</b> |
|----------------------------|----------------|-------------|---------------|-------------|---------------|
| <b>Carbohydrates (g)</b>   | 63             | 63          | 20            | 16          | 16            |
| Corn starch                | 15.75          | 15.75       | 5             | 4           | 4             |
| Sucrose                    | 47.25          | 47.25       | 15            | 12          | 12            |
| <b>Protein (g)</b>         | 15.3           | 15.3        | 34.3          | 62.3        | 62.3          |
| Casein                     | 15             | 15          | 34            | 62          | 62            |
| DL-Methionine              | 0.3            | 0.3         | 0.3           | 0.3         | 0.3           |
| <b>Fat (g)</b>             | 12             | 12          | 36            | 12          | 12            |
| Fish oil                   | --             | 4           | 12            | --          | 4             |
| Corn oil                   | 5              | 1           | 3             | 5           | 1             |
| Coconut oil                | 2              | 2           | 11            | 2           | 2             |
| Flax oil                   | 1              | 2           | 6             | 1           | 2             |
| Cow butter                 | 4              | 3           | 4             | 4           | 3             |
| Cellulose                  | 5              | 5           | 5             | 5           | 5             |
| Mineral Mix S10001         | 3.5            | 3.5         | 3.5           | 3.5         | 3.5           |
| Vitamin Mix V10001         | 1              | 1           | 1             | 1           | 1             |
| Choline Bitartrate         | 0.2            | 0.2         | 0.2           | 0.2         | 0.2           |
| <b>Total (g)</b>           | 100            | 100         | 100           | 100         | 100           |
| <b>Energy contribution</b> |                |             |               |             |               |
| Carbohydrate (kcal %)      | 59.8           | 59.8        | 14.8          | 15.2        | 15.2          |
| Protein (kcal %)           | 14.5           | 14.5        | 25.4          | 59.2        | 59.2          |
| Fat (kcal %)               | 25.6           | 25.6        | 59.9          | 25.6        | 25.6          |
| kcal/g diet                | 4.21           | 4.21        | 5.41          | 4.21        | 4.21          |

Control, high carbohydrate/low omega-3; HC+3, high carbohydrate/high omega-3; LCHF+3, low carbohydrate/high fat/high omega-3; LCHP, low-carbohydrate/high-protein/low omega-3; LCHP+3, low-carbohydrate/high-protein/high omega-3.

**Table S2.** Fatty acid profile of the experimental diets (% of total fatty acids).

|                              | <b>Control</b> | <b>HC+3</b> | <b>LCHF+3</b> | <b>LCHP</b> | <b>LCHP+3</b> |
|------------------------------|----------------|-------------|---------------|-------------|---------------|
| <b>SFA (%)</b>               | 43.63          | 37.84       | 41.77         | 43.63       | 37.84         |
| C8:0                         | 0.62           | 0.52        | 0.59          | 0.62        | 0.52          |
| C10:0                        | 9.70           | 9.42        | 16.10         | 9.70        | 9.42          |
| C12:0                        | 8.39           | 7.50        | 9.18          | 8.39        | 7.50          |
| C16:0                        | 18.71          | 13.78       | 10.59         | 18.71       | 13.78         |
| C17:0                        | 0.26           | 0.26        | 0.16          | 0.26        | 0.26          |
| C18:0                        | 5.42           | 5.79        | 4.68          | 5.42        | 5.79          |
| C20:0                        | 0.17           | 0.32        | 0.31          | 0.17        | 0.32          |
| <b>MUFA (%)</b>              | 23.13          | 17.10       | 13.99         | 23.13       | 17.10         |
| C14:1                        | 0.47           | 0.35        | 0.16          | 0.47        | 0.35          |
| C16:1                        | 0.83           | 1.18        | 0.87          | 0.83        | 1.18          |
| C17:1                        | 0.13           | 0.19        | 0.14          | 0.13        | 0.19          |
| C18:1                        | 21.47          | 14.58       | 12.06         | 21.47       | 14.58         |
| C20:1                        | 0.20           | 0.79        | 0.75          | 0.20        | 0.79          |
| C22:1                        | 0.03           | 0.01        | 0.01          | 0.03        | 0.01          |
| <b>PUFA (%)</b>              | 33.24          | 45.06       | 44.23         | 33.24       | 45.06         |
| <b>omega-6 PUFA (%)</b>      | 27.89          | 10.88       | 10.16         | 27.89       | 10.88         |
| C18:2                        | 26.58          | 9.73        | 9.03          | 26.58       | 9.73          |
| C18:3 (omega-6)              | 1.31           | 0.33        | 0.31          | 1.31        | 0.33          |
| C20:4                        | --             | 0.82        | 0.82          | --          | 0.82          |
| <b>omega-3 PUFA (%)</b>      | 5.35           | 34.18       | 34.07         | 5.35        | 34.18         |
| C18:3 (omega-3)              | 5.35           | 9.98        | 9.87          | 5.35        | 9.98          |
| C20:5                        | --             | 14.08       | 14.08         | --          | 14.08         |
| C22:5                        | --             | 1.66        | 1.66          | --          | 1.66          |
| C22:6                        | --             | 8.46        | 8.46          | --          | 8.46          |
| <b>omega-6/omega-3 ratio</b> | 5.21           | 0.32        | 0.30          | 5.21        | 0.32          |

Control, high carbohydrate/low omega-3; HC+3, high carbohydrate/high omega-3; LCHF+3, low carbohydrate/high fat/high omega-3; LCHP, low-carbohydrate/high-protein/low omega-3; LCHP+3, low-carbohydrate/high-protein/high omega-3; SFA, saturated fatty acid; MUFA, monounsaturated fatty acid; PUFA, polyunsaturated fatty acid.

**Table S3.** Macronutrient and omega-6/omega-3 ratios of the diets used in the parallel studies.

|                              | <b>LCHP Diet</b> | <b>LCHP+3 Diet</b> | <b>Western Diet</b>     |
|------------------------------|------------------|--------------------|-------------------------|
| # Product                    | Self-made        | Self-made          | ResearchDiets (D12079B) |
| <b>Energy contribution</b>   |                  |                    |                         |
| Carbohydrate (% kcal)        | 25.6             | 25.6               | 43.0                    |
| Protein (% kcal)             | 59.2             | 59.2               | 17.0                    |
| FAT (% kcal)                 | 15.2             | 15.2               | 41.0                    |
| kcal/g                       | 4.21             | 4.21               | 4.69                    |
| <b>omega-6/omega-3 ratio</b> | 5.21             | 0.32               | 11.04                   |

LCHP, low-carbohydrate/high-protein/low omega-3; LCHP+3, low-carbohydrate/high-protein/high omega-3.
